# Supplementary material
Source: publisher figshare collection journal article supplement (https://acs.figshare.com/ndownloader/files/4048336)
Supplement: Supplementary file 1 [file 4048336]

## Sheet: Sheet1
Supplementary Table S9- Select overlapping functional themes (Enriched KEGG Pathways, Gene Ontology- biological process and Reactome pathway) associated with NS5A interacting bottlenecks
NS5A interacting Bottlenecks	Enriched functional themes- KEGG pathways	Enriched functional themes- Gene Ontology (biological process) associations	Enriched functional themes- Reactome pathways
AKT1, FYN, GRB2, LCK, LYN, PIK3R1, PIN1, SRC, STAT1, SYK, TRAF2	KEGG subclass "Immune System"	"immune system process" (GO:0002376)	"Immune System" (REACT_6900)
AKT1, AXIN1, CTNNB1, GRB2, GS3KB, HSP90AA1, JAK1, LCK, LYN, PIK3R1, PPP2CA, RAF1, SRC, STAT1, SYK, TGFBR1, THBS1, TP53, TRAF2	KEGG subclass "Signal Transduction"	"signal transduction" (GO:0007165)	"Signaling Pathways" (REACT_111102)
CTNNB1, GSK3B, PPP2CA, SRC, THBS1	"Adherens junction" (hsa04520); "Focal adhesion" (hsa04510); "Tight junction" (hsa04530)	"cell adhesion" (GO:0007155)	"Cell-Cell communication" (REACT_111155); "Integrin cell surface interactions" (REACT_13552)- CTNNB1, SRC, THBS1
AKT1, TP53, TRAF2	"Apoptosis" (hsa04210)	"cell death" (GO:0008219)	"Apoptosis" (REACT_578)
LYN, SYK	"B cell receptor signaling pathway" (hsa04662)	"B cell receptor signaling pathway" (GO:0050853)	"B Cell Activation" (REACT_118773)
CDK1, PLK1, TP53	"Cell cycle" (hsa04110)	"cell cycle" (GO:0007049)	"Cell Cycle" (REACT_115566)
LYN, SRC, STAT1	"Chemokine signaling pathway" (hsa04062)	"cytokine-mediated signaling pathway" (GO:0019221); "response to cytokine stimulus" (GO:0034097)	"Cytokine Signaling in Immune system" (REACT_75790)- LYN, STAT1
HSPB1, LCK	"Epstein-Barr virus infection" (hsa05169); "HTLV-I infection" (hsa05166)	"response to virus" (GO:0009615)
AKT1, GRB2, PIK3R1, RAF1	"Insulin signaling pathway" (hsa04910)	"insulin receptor signaling pathway" (GO:0008286)	"Signaling by Insulin receptor" (REACT_498); "IRS-mediated signalling" (REACT_332)
RAF1, TGFBR1, TRAF2	"MAPK signaling pathway" (hsa04010)	"MAPK cascade" (GO:0000165);	"RAF/MAP kinase cascade" (REACT_634)- RAF1
AKT1, GRB2, GSK3B, PIK3R1, RAF1	"Neurotrophin signaling pathway" (hsa04722)	"nerve growth factor receptor signaling pathway" (GO:0048011)	"NGF signalling via TRKA from the plasma membrane" (REACT_12056)
TRAF2	"NF-kappa B signaling pathway" (hsa04064)	"positive regulation of NF-kappaB transcription factor activity" (GO:0051092)	"TRAF6 mediated NF-kB activation" (REACT_24969)
AKT1, GRB2, GSK3B, PIK3R1	"PI3K-Akt signaling pathway" (hsa04151)		"PI3K/AKT activation" (REACT_12464); "PI3K/AKT Signaling in Cancer" (REACT_147723); "Constitutive PI3K/AKT Signaling in Cancer" (REACT_147727)
AKT1, FYN, GRB2, LCK, PIK3R1	"T cell receptor signaling pathway" (hsa04660)	"T cell receptor signaling pathway" (GO:0050852)
